# Supplementary material
Source: PubMed Central journal article supplement (PMC4684691)

# Figure S1

## A Regions with excess coverage in the turquoise killifish genome assembly

| Regions with excess coverage     | Length (Mb) | Portion of assembly (%) | Proportion of reads (%) | Over-representation |
|----------------------------------|-------------|-------------------------|-------------------------|---------------------|
| > 2 times the expected coverage  | 455         | 44.5                    | 70.1                    | 1.6X                |
| > 3 times the expected coverage  | 47          | 4.6                     | 26.0                    | 5.7X                |
| > 4 times the expected coverage  | 21          | 2.0                     | 20.1                    | 10.4X               |
| > 10 times the expected coverage | 10          | 1.0                     | 17.4                    | 17.4X               |

## B Assembled transcript mapping

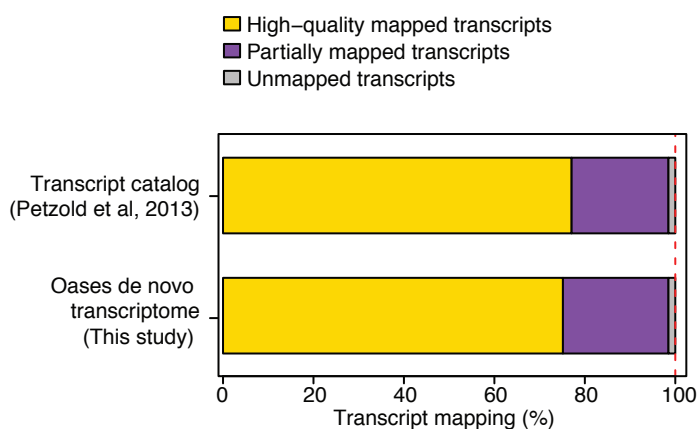

## C Paired-end RNA-seq mapping

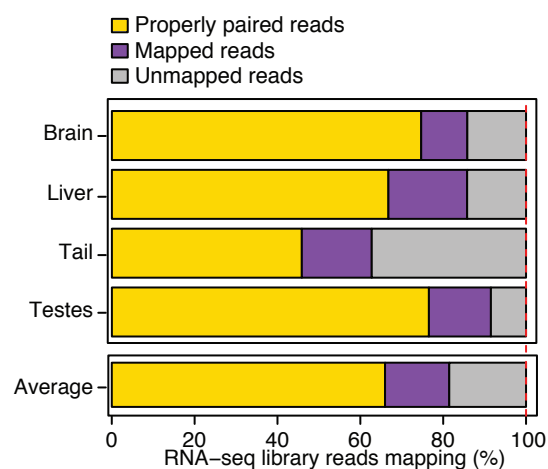

## D Alignment of Sanger-sequenced genome shotgun contigs

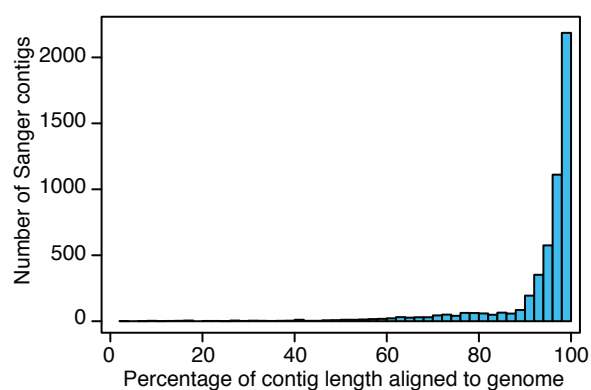

## E Gene body RNA-seq support

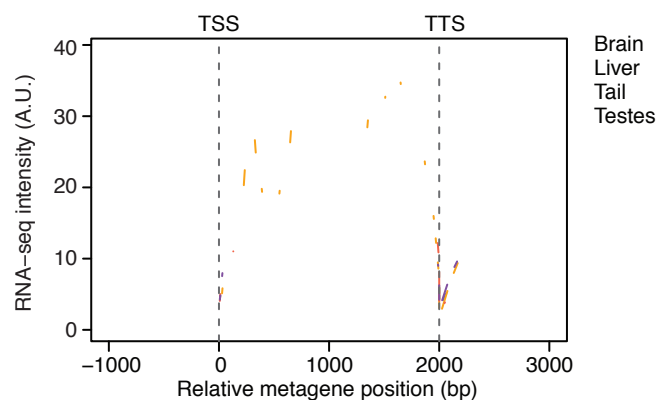

## F Promoter annotation quality

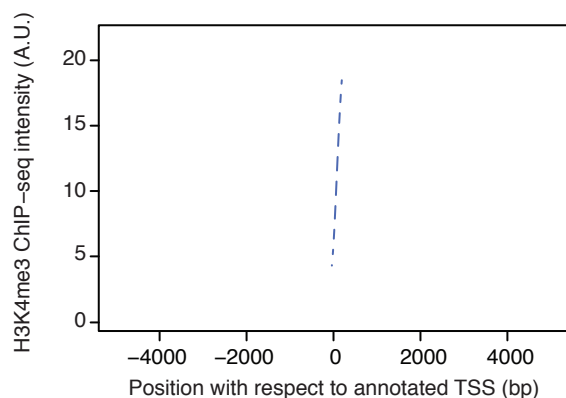

## G Nomenclature for protein-coding genes

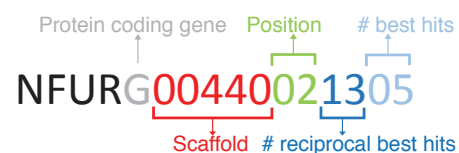

Supplement: NIHMS736439-supplement-1.pdf [file NIHMS736439-supplement-1.pdf]
