# Supplementary material
Source: PubMed Central journal article supplement (PMC4684691)
Supplement: NIHMS736439-supplement-2.pdf [file NIHMS736439-supplement-2.pdf]

# Figure S2

**A** Paralog numbers in turquoise killifish vs. medaka

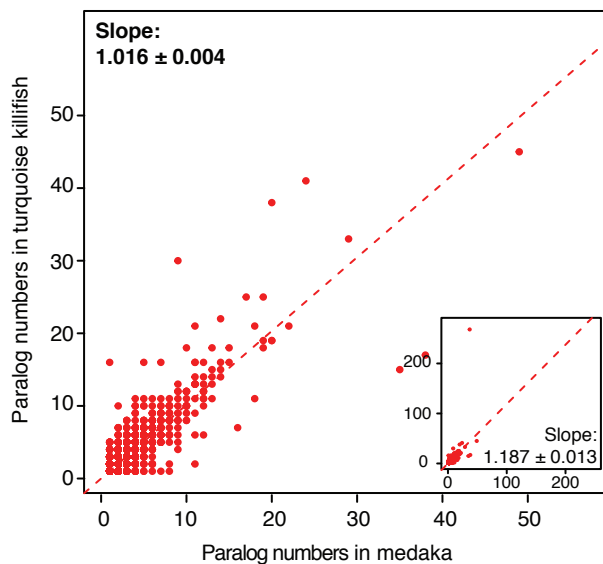

**B** Paralog numbers in platyfish vs. medaka

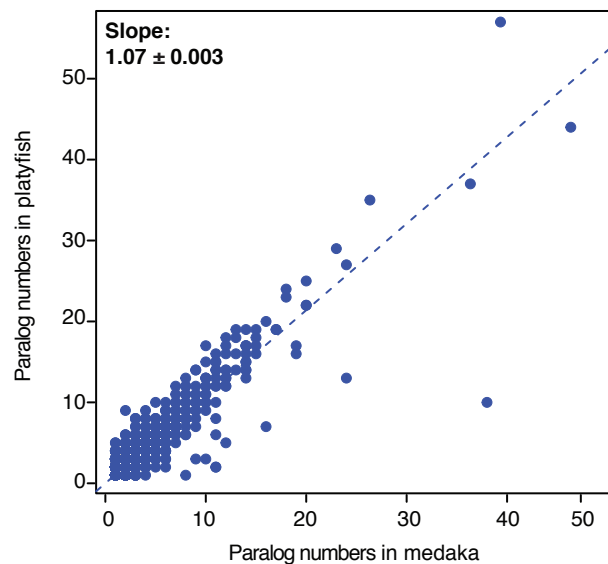

**C** Synteny between turquoise killifish and medaka

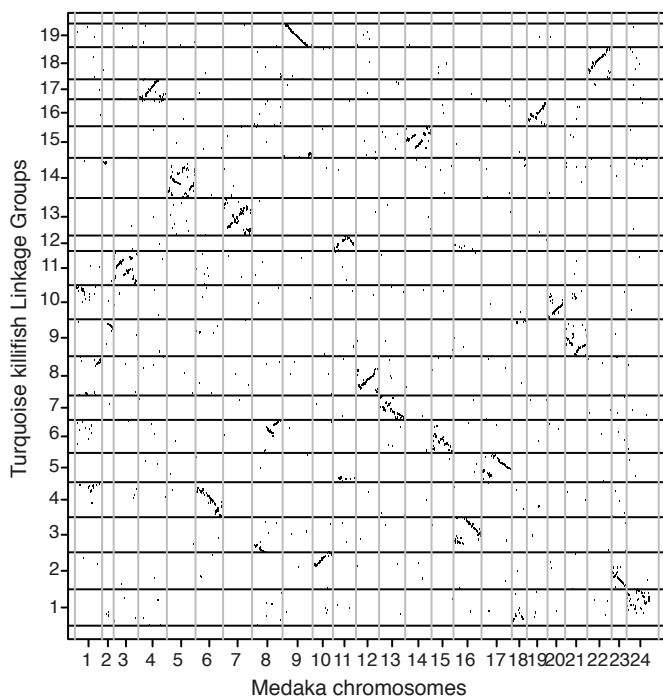

**D** Synteny between platyfish and medaka

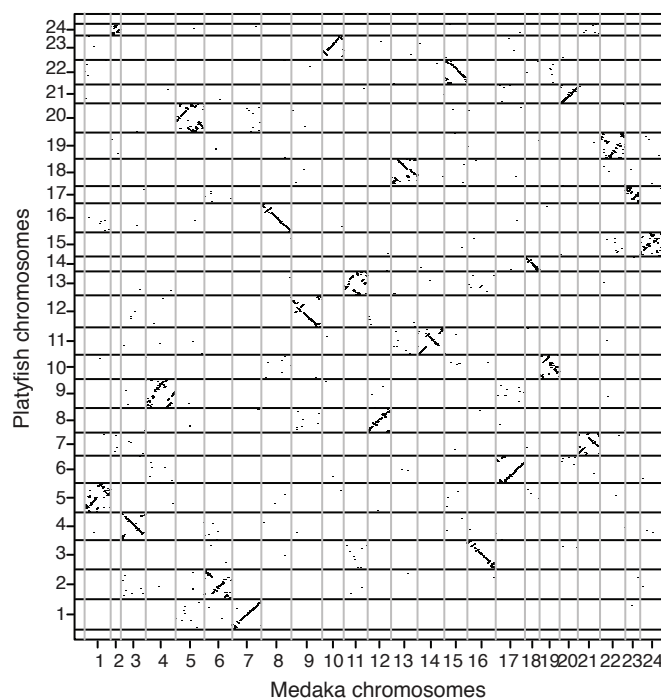

**E** Nomenclature for lncRNA genes

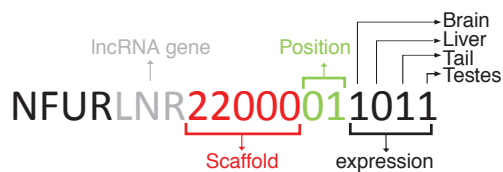

**F** ncRNA gene predictions

| ncRNA gene type       | Number | Prediction algorithm       |
|-----------------------|--------|----------------------------|
| putative rRNA genes   | 200    | RNAmmmer*                  |
|                       | 320    | Infernal                   |
|                       | 504    | RepeatMasker               |
| putative tRNA genes   | 1,841  | tRNA-scan SE*              |
|                       | 4,344  | tRNA-scan SE (pseudogenes) |
|                       | 1,760  | Infernal                   |
|                       | 2,172  | RepeatMasker               |
| putative snRNA genes  | 230    | Infernal*                  |
|                       | 223    | RepeatMasker               |
| putative snoRNA genes | 191    | Infernal*                  |
| putative miRNA genes  | 2,029  | Infernal*                  |

\*Higher specificity predictions
