# Supplementary material
Source: PubMed Central journal article supplement (PMC4684691)

**Figure S3**

**A Identification of turquoise killifish genes under positive selection**

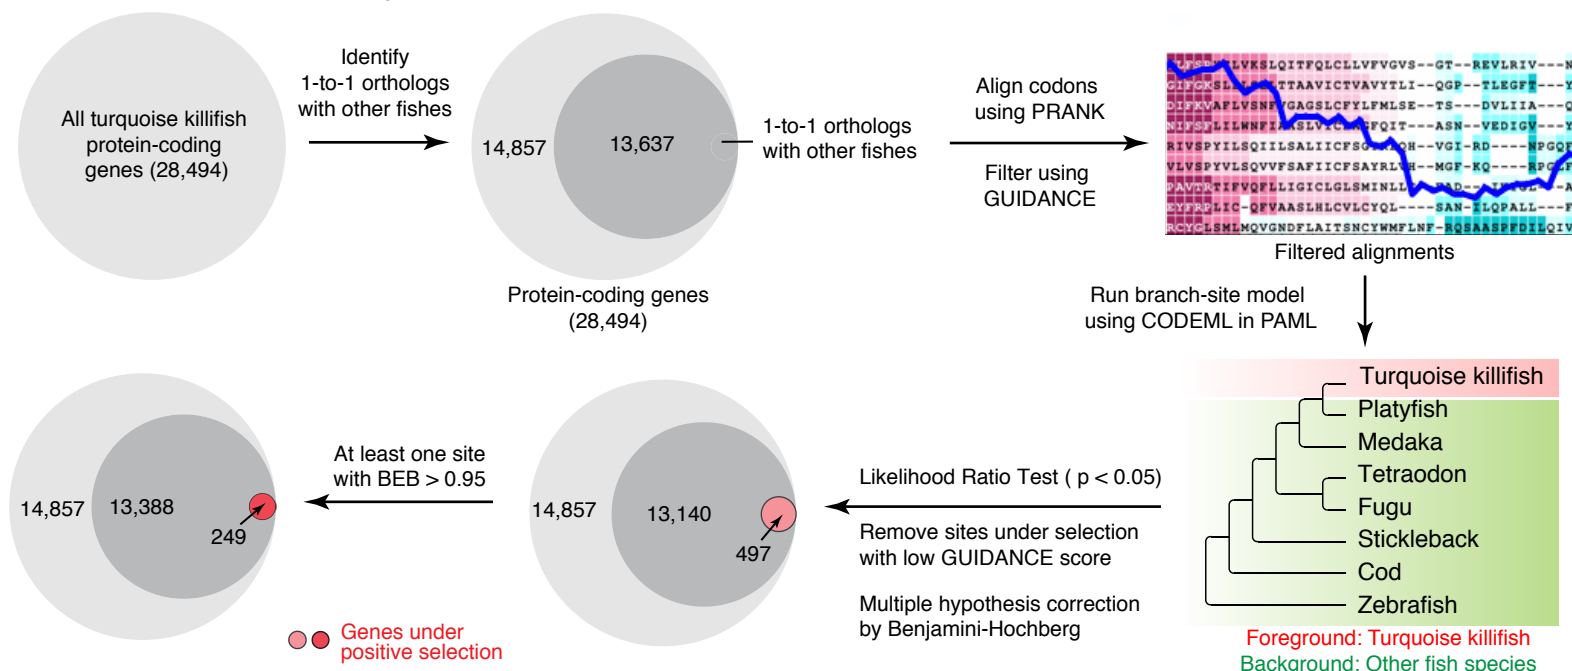

**B Functional effect prediction for the sites under positive selection**

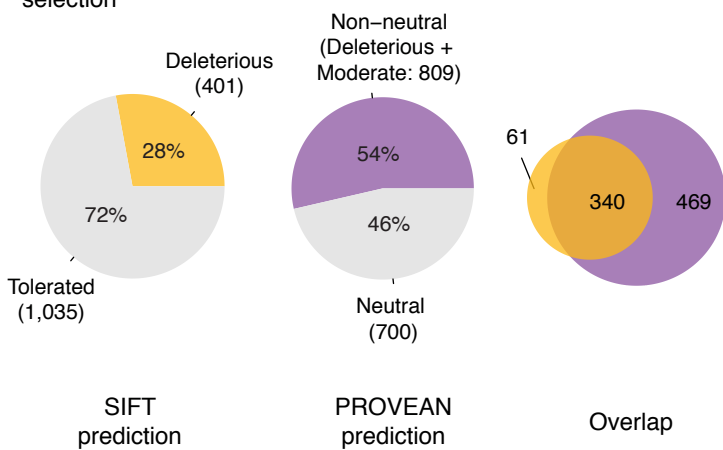

**C Comparison of residues under positive selection and inter-individual/strain variants**

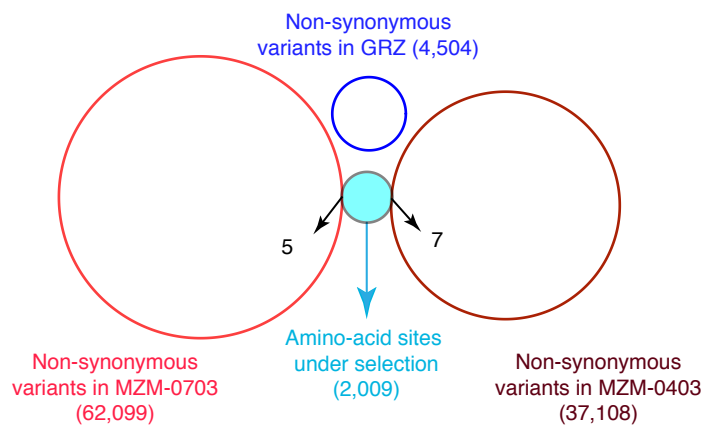

**D Genes under positive selection and deregulated during brain aging (MZM-0410; FDR 5%)**

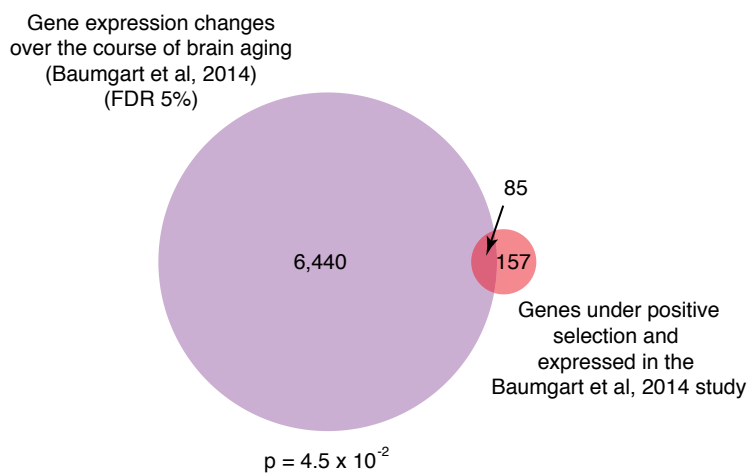

**E Expression profile of genes under positive selection and deregulated during brain aging (MZM-0410; FDR 5%)**

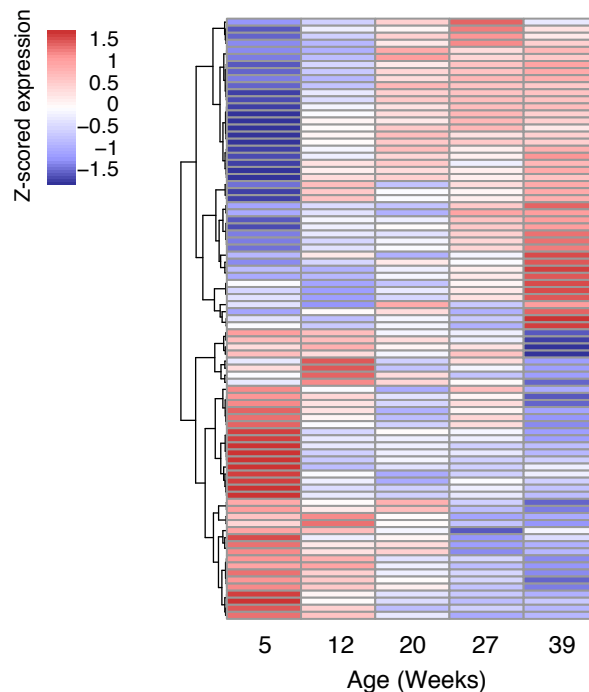

Supplement: NIHMS736439-supplement-3.pdf [file NIHMS736439-supplement-3.pdf]
