# Supplementary material
Source: PubMed Central journal article supplement (PMC4684691)

# Figure S4

## A Residues under positive selection in XRCC5

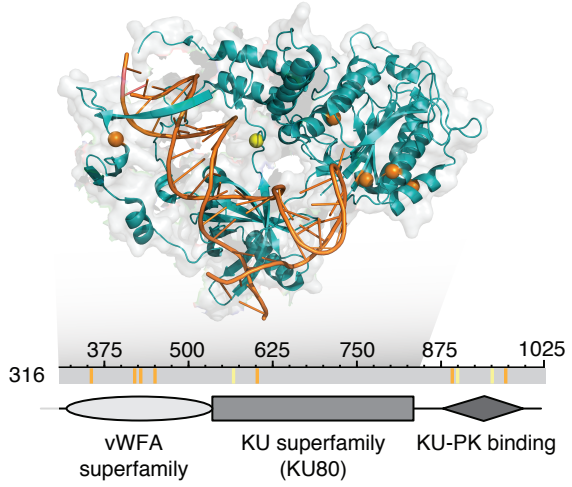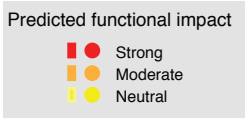

## B Residues under positive selection in BAX

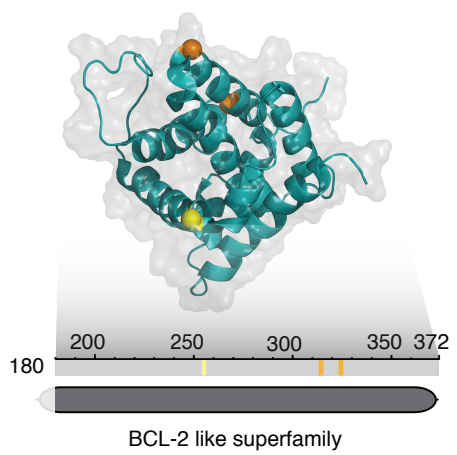

## C Residues under positive selection in MGAT5(1of3)

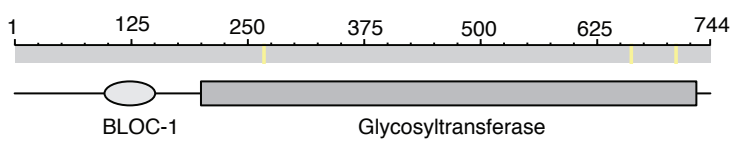

## D Residues under positive selection in IRS1(2of2)

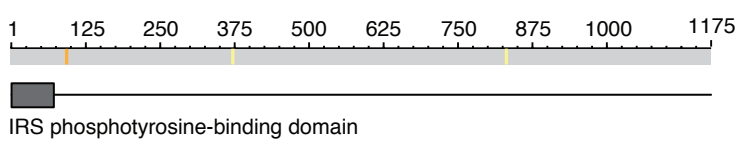

## E Residues and variants in IGF1R(1of2) in turquoise killifish and DAF-2 in *C. elegans*

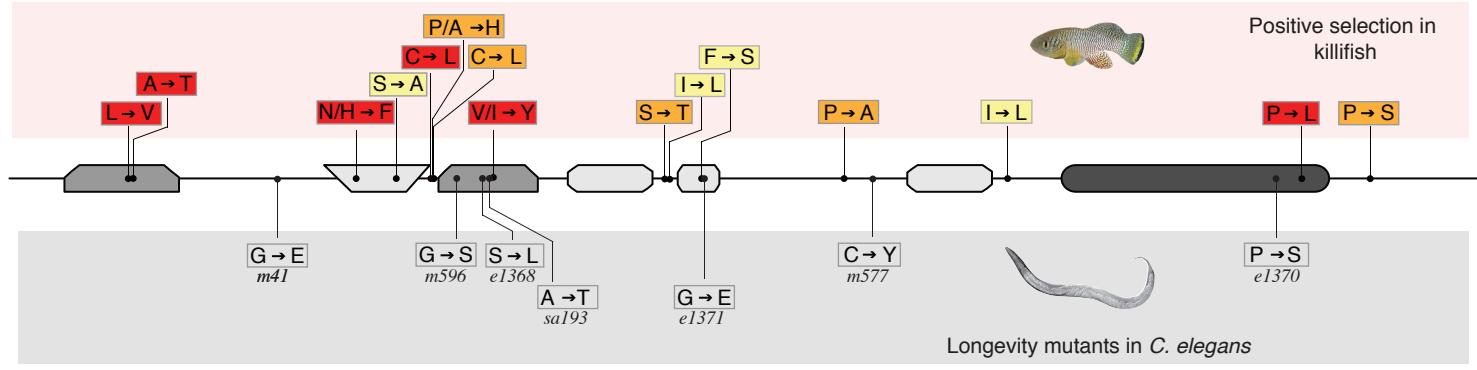

## F Residues and variants in CEL(7of7) in the turquoise killifish and bowhead whale

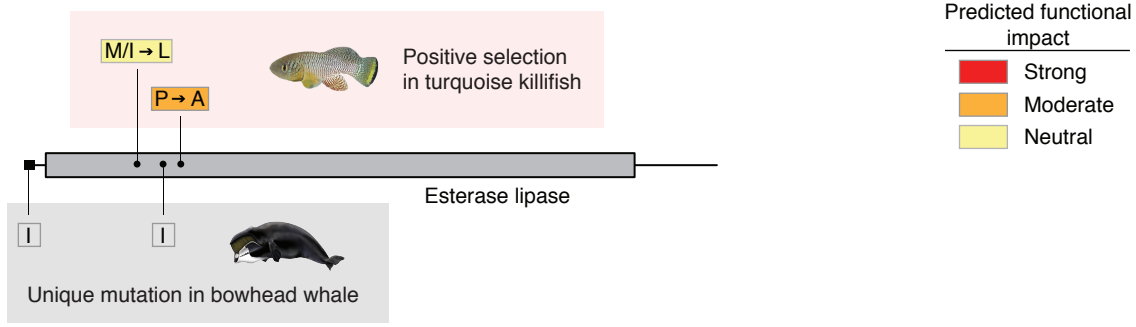

Supplement: NIHMS736439-supplement-4.pdf [file NIHMS736439-supplement-4.pdf]
