# Supplementary material
Source: PubMed Central journal article supplement (PMC4684691)

Figure S6

A GRZ lifespan stratified by sex

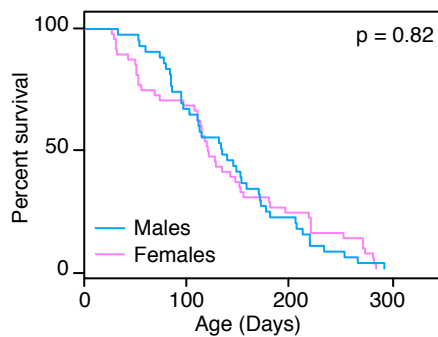

B MZM-0703 lifespan stratified by sex

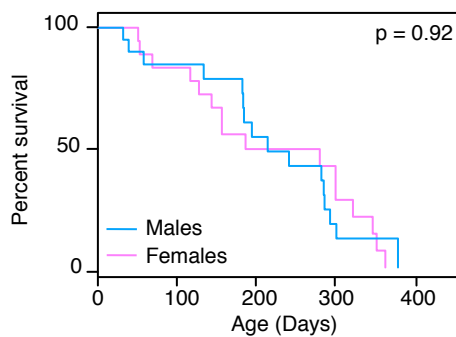

C F1 lifespan stratified by sex

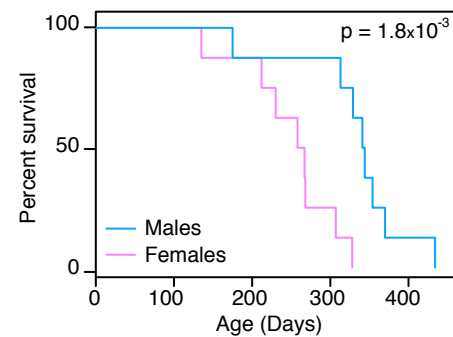

D F2 lifespan stratified by sex

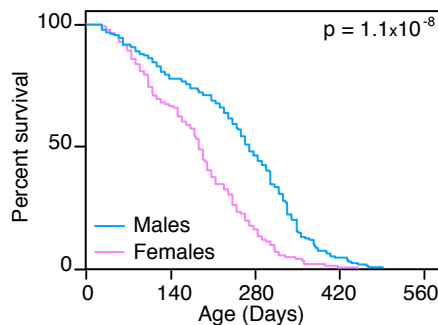

E Lifespan and heterozygosity in F2 individuals

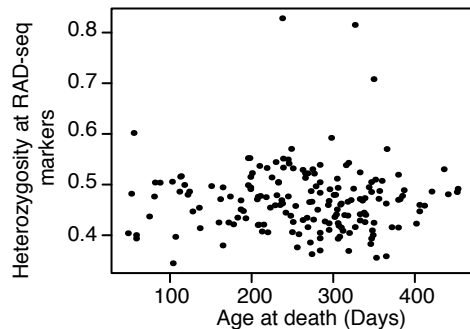

F Lifespan stratified by sex and genotype at LG-3 peak marker (Marker 46347)

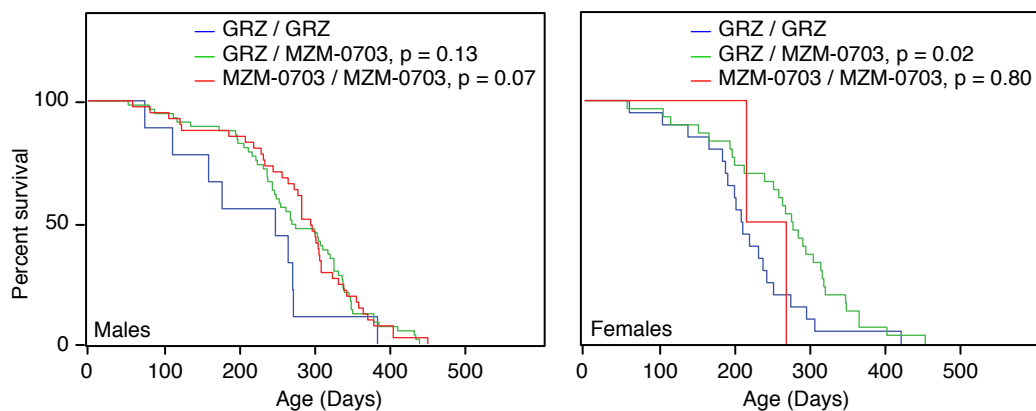

Supplement: NIHMS736439-supplement-6.pdf [file NIHMS736439-supplement-6.pdf]
