# Supplementary material
Source: PubMed Central journal article supplement (PMC4684691)

# Figure S7

## A SNPs in MZM-0703 vs. GRZ in the region underlying the lifespan QTL (cross GxM P0)

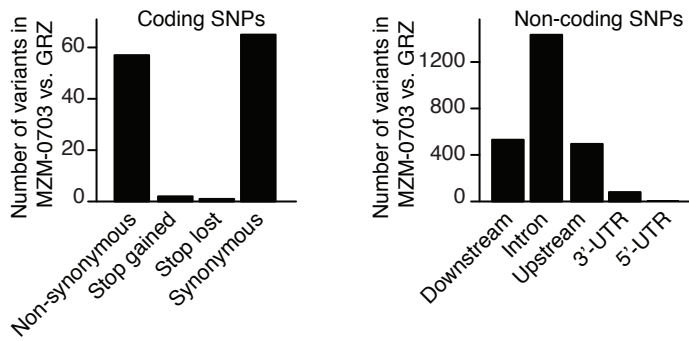

## B Candidate genes in lifespan QTL region with non-synonymous SNPs at conserved sites (Illumina sequencing)

| Gene                 | GRZ aa     | MZM-0703 aa | MZM-0403 aa | Consensus aa |
|----------------------|------------|-------------|-------------|--------------|
| <i>ATXN7L1</i>       | G589       | R589        | R589        | R/K          |
| <i>GRN</i>           | Q151, W449 | H151, C449  | H151, C449  | H/F, C       |
| <i>HIPK2(11of26)</i> | H218, K321 | Y218, T321  | Y218, T321  | Y, T         |
| <i>IFI35</i>         | M196       | L196        | L196        | L            |
| <i>TTYH3A</i>        | S423       | T423        | T423        | T            |
| <i>ZNF800A</i>       | N489       | T489        | T489        | T/S          |

## C GRN mutiple protein alignment (turquoise killfish residue 151)

```

T. killifish CPDGKHCCPEGQRCSNACHSCIKK - 163
Platyfish   CSDGKHCCPEGHHCSDRSRSCIKK - 163
Medaka      CPDGKHCCPEGHQCSDLRSRSCVKK - 163
Fugu        CPDSKTM----- - 107
Stickleback CSDGKHCCPEGHQCSADCRSCIKQ - 117
Zebrafish   CSDGKHCCPNDEHCSSDSSLVCVKR - 162
Human       CGDGHCCPRGFHCADGRSCFQR - 115
    
```

## D GRN mutiple protein alignment (turquoise killfish residue 449)

```

T. killifish DTTCCFIASLKKWGWCCPLPKAVCCSDGAHC - 464
Platyfish   DTTCCFMQSKKWGCCPLPKAVCCADGNHC - 694
Medaka      QTTCCKTQE-GGWGCCPFPEAVCCADGEHC - 644
Fugu        GSTCCMAS-GQWACCPLPEAVCCEDGDHC - 373
Stickleback SNTCCFMAESQKWGCCPLPKAVCCSDGNHC - 423
Zebrafish   SSTCCKNIA-GEWGCCPFPSQAVCCTDGEHC - 669
Human       SDTCCQLTS-GEWGCCPIPEAVCCSDHQHC - 403
    
```

## E GRN protein sequence in turquoise killfish strains, wild-caught fish and other species (turquoise killfish residue 449)

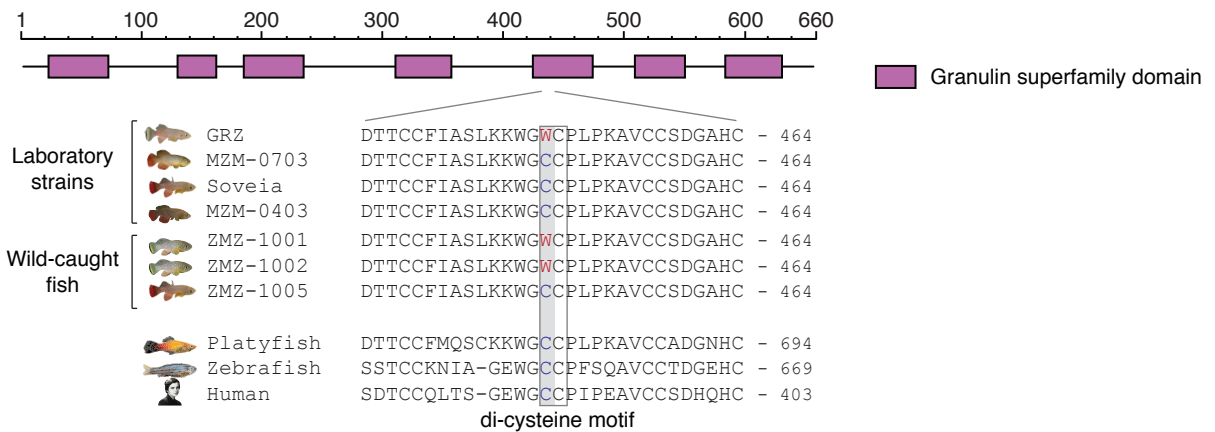

## F Genotype frequency distortion and recombination

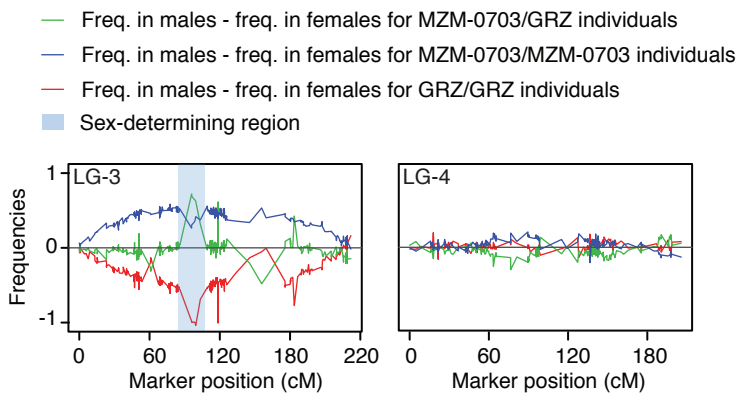

## G Genotype frequency distortion in F2 males vs. females

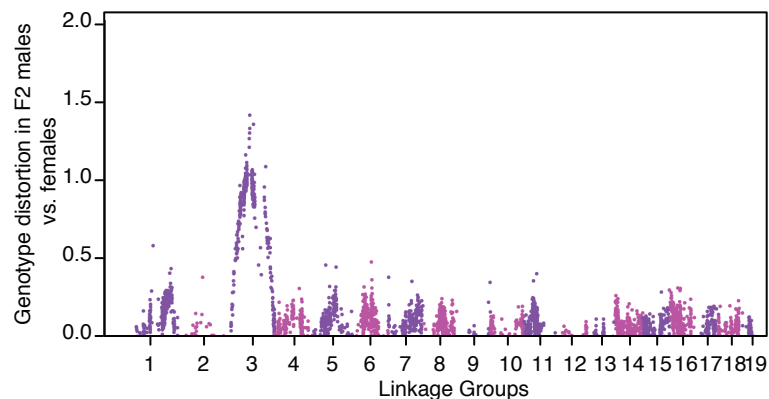

Supplement: NIHMS736439-supplement-7.pdf [file NIHMS736439-supplement-7.pdf]
