# Supplementary material
Source: PubMed Central journal article supplement (PMC4684691)

Figure S5

A Geographic origin of strains

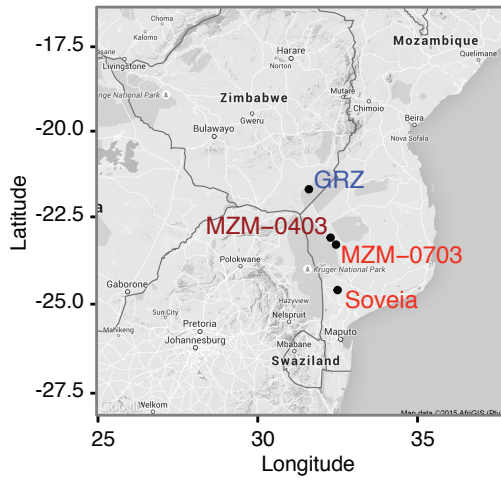

B Summary of predicted effect of annotated SNPs

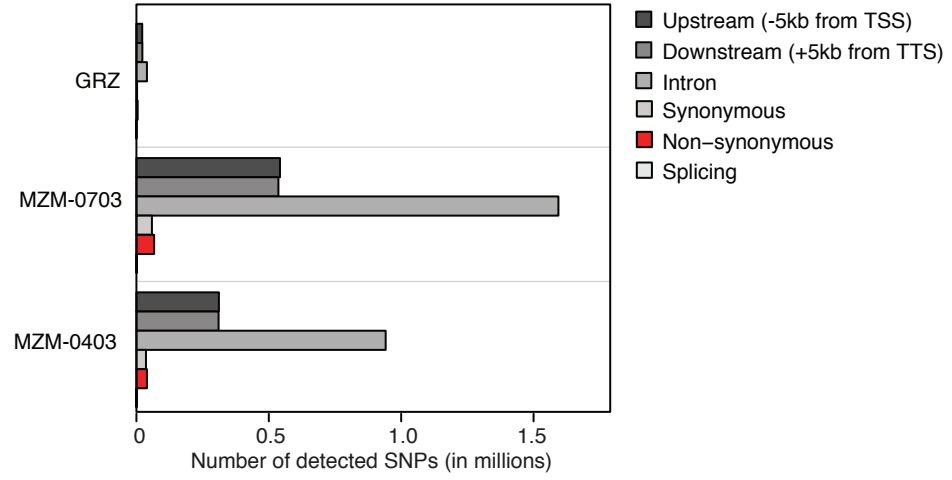

Supplement: NIHMS736439-supplement-5.pdf [file NIHMS736439-supplement-5.pdf]
